# Supplementary material for: Histiocytic and Dendritic Cell Sarcomas of Hematopoietic Origin Share Targetable Genomic Alterations Distinct from Follicular Dendritic Cell Sarcoma
Source: PubMed Central journal article supplement — Oncologist. 2021 May 6;26(7):e1263–72. doi: 10.1002/onco.13801 (PMC8265357; doi:10.1002/onco.13801), 2021-05-06
Supplement: ONCO-26-e1263-s002.pdf [file ONCO-26-e1263-s002.pdf]

Supplemental Tables for:  
Histiocytic and dendritic cell sarcomas of hematopoietic origin share targetable genomic alterations distinct from follicular dendritic cell sarcoma  
Lucas R Massoth et al.

Table S1. List of sequenced genes in the FoundationOne CDx and F1H platforms

Genes in F1CDx Panel; Foundation Medicine testing is clinically validated to a level of detection of 1%. Variants were annotated as known or likely pathogenic using previously published interpretation methods.<sup>6</sup>

| Genes with full coding exonic regions for detection of substitutions, indels, and copy number alterations |        |         |        |         |        |        |          |          |        |         |        |         |         |         |        |        |        |        |        |     |
|-----------------------------------------------------------------------------------------------------------|--------|---------|--------|---------|--------|--------|----------|----------|--------|---------|--------|---------|---------|---------|--------|--------|--------|--------|--------|-----|
| ABL1                                                                                                      | ACVR1B | AKT1    | AKT2   | AKT3    | ALK    | AMER1  | APC      | AR       | ARAF   | ARFRP1  | ARID1A | ASXL1   | ATM     | ATR     | ATRX   | AURKA  | AURKB  | AXL    | BAP1   |     |
| BARD1                                                                                                     | BCL2   | BCL2L1  | BCL2L2 | BCL6    | BCOR   | BCORL1 | BRAF     | BRCA1    | BRCA2  | BRD4    | BRIP1  | BTG1    | BTG2    | BTK     | 0      | CALR   | CARD11 | CBFB   | CBL    |     |
| CCND1                                                                                                     | CCND2  | CCND3   | CCNE1  | CD22    | CD274  | CD70   | CD79A    | CD79B    | CDC73  | CDH1    | CDK12  | CDK4    | CDK6    | CDK8    | CDKN1A | CDKN1B | CDKN2A | CDKN2B | CDKN2C |     |
| CEBPA                                                                                                     | CHEK1  | CHEK2   | CIC    | CREBBP  | CRKL   | CSF1R  | CSF3R    | CTCF     | CTNNA1 | CTNNB1  | CUL3   | CXCR4   | DAXX    | DDR2    | A      | DOT1L  | EED    | EGFR   | EP300  |     |
| EPHA3                                                                                                     | EPHB1  | ERBB2   | ERBB3  | ERBB4   | ERG    | ERRFI1 | ESR1     | EZH2     | B      | FAM46C  | FANCA  | FANCC   | FANCG   | FANCL   | FAS    | FBXW7  | FGF10  | FGF14  | FGF19  |     |
| FGF23                                                                                                     | FGF3   | FGF4    | FGF6   | FGFR1   | FGFR2  | FGFR3  | FGFR4    | FH       | FLCN   | FLT1    | FLT3   | FOXL2   | FUBP1   | GABRA6  | GATA3  | GATA4  | GATA6  | GID4   | GNA11  |     |
| GNA13                                                                                                     | GNAQ   | GNAS    | GRM3   | GSK3B   | H3F3A  | HDAC1  | HGF      | HNF1A    | HRAS   | HSD3B1  | ID3    | IDH1    | IDH2    | IGF1R   | IKBKE  | IKZF1  | INPP4B | IRF2   | IRF4   |     |
| IRS2                                                                                                      | JAK1   | JAK2    | JAK3   | JUN     | KDM5A  | KDM5C  | KDM6A    | KDR      | KEAP1  | KEL     | KIT    | KLHL6   | KMT2A   | KMT2D   | KRAS   | LYN    | MAF    | MAP2K1 | MAP2K2 |     |
| MAP2K4                                                                                                    | MAP3K1 | MAPK1   | MCL1   | MDM2    | MDM4   | MED12  | MEF2B    | MEN1     | MET    | MITF    | MLH1   | MMSET   | MPL     | MRE11   | A      | MSH2   | MSH3   | MSH6   | MTAP   |     |
| MTOR                                                                                                      | MUTYH  | MYC     | MYCL   | MYCN    | MYD88  | NF1    | NF2      | NFE2L2   | NFKBIA | NKX2-1  | NOTCH1 | NOTCH2  | NOTCH3  | NPM1    | NRAS   | NSD2   | NSD3   | NT5C2  | NTRK1  |     |
| NTRK2                                                                                                     | NTRK3  | P2RY8   | PALB2  | PARK2   | PAX5   | PBRM1  | PDCD1    | 2        | PDGFRA | PDGFRB  | PKD1   | PIK3C2B | PIK3CA  | PIK3CB  | PIK3R1 | PIM1   | PMS2   | POLD1  | POLE   |     |
| PPP2R1A                                                                                                   | PRDM1  | PRKAR1A | PRKCI  | PRKN    | PTCH1  | PTEN   | PTPN11   | PTPRO    | QKI    | RAC1    | RAD21  | RAD51   | RAF1    | RARA    | RB1    | RBM10  | RET    | RICTOR | RNF43  |     |
| ROS1                                                                                                      | RPTOR  | SDHA    | SDHB   | SDHC    | SDHD   | SETD2  | SF3B1    | SGK1     | SMAD2  | SMAD4   | 4      | SMARCA1 | SMARCB1 | SMO     | SNCAIP | SOCS1  | SOX2   | SOX9   | SPEN   |     |
| SRC                                                                                                       | STAG2  | STAT3   | STK11  | SUFU    | SYK    | TBX3   | TERC     | TET2     | TGFBR2 | TNFAIP3 | 4      | TP53    | TSC1    | TSC2    | U2AF1  | VEGFA  | VHL    | WHSC1  | 1      |     |
| WT1                                                                                                       | WTX    | XPO1    | ZNF217 | ZNF703  |        |        |          |          |        |         |        |         |         |         |        |        |        |        |        |     |
| Genes with select intronic regions                                                                        |        |         |        |         |        |        |          |          |        |         |        |         |         |         |        |        |        |        |        |     |
| ALK                                                                                                       | BCL2   | BCR     | BRAF   | BRCA1   | BRCA2  | EGFR   | ETV4     | ETV5     | ETV6   | EWSR1   | FGFR1  | FGFR2   | FGFR3   | KIT     | KMT2A  | MSH2   | MYB    | MYC    | NOTCH2 |     |
| NTRK1                                                                                                     | NTRK2  | NUTM1   | PDGFRA | RAF1    | RARA   | RET    | ROS1     | SLC34A2  | TERT   | 2       |        |         |         |         |        |        |        |        |        |     |
| Genes in F1H DNA Panel                                                                                    |        |         |        |         |        |        |          |          |        |         |        |         |         |         |        |        |        |        |        |     |
| Genes with full coding exonic regions for detection of substitutions, indels, and copy number alterations |        |         |        |         |        |        |          |          |        |         |        |         |         |         |        |        |        |        |        |     |
| ABI1                                                                                                      | ACTB   | ADGRA2  | AKT1   | AKT2    | AKT3   | ALK    | AMER1    | APC      | APH1A  | AR      | ARAF   | ARFRP1  | 6       | ARHGAP2 | ARID1A | ARID2  | ASMTL  | ASXL1  | ATM    | ATR |
| ATRX                                                                                                      | AURKA  | AURKB   | AXIN1  | AXL     | B2M    | BAP1   | BARD1    | BCL10    | BCL11B | BCL2    | BCL2L2 | BCL6    | BCOR    | BCORL1  | BIRC3  | BLM    | BRAF   | BRCA1  | BRCA2  |     |
| BRD4                                                                                                      | BRIP1  | BRSK1   | BTG1   | BTG2    | BTK    | BTLA   | C11orf30 | C17orf39 | CAD    | CARD11  | CBFB   | CBL     | CCND1   | CCND2   | CCND3  | CCNE1  | CCT6B  | CD22   | CD274  |     |
| CD36                                                                                                      | CD58   | CD70    | CD79A  | CD79B   | CDC73  | CDH1   | CDK12    | CDK4     | CDK6   | CDK8    | CDKN1B | CDKN2A  | CDKN2B  | CDKN2C  | CEBPA  | CHEK1  | CHEK2  | CIC    | CIITA  |     |
| CKS1B                                                                                                     | CPS1   | CREBBP  | CRKL   | CRLF2   | CSF1R  | CSF3R  | CTCF     | CTNNA1   | CTNNB1 | CUX1    | CXCR4  | DAXX    | DDR2    | DDX3X   | DNM2   | DNMT3A | DOT1L  | DTX1   | DUSP2  |     |
| DUSP9                                                                                                     | E2A    | EBF1    | ECT2L  | EED     | EGFR   | ELP2   | EMSY     | EP300    | EPHA3  | EPHA5   | EPHA7  | EPHB1   | ERBB2   | ERBB3   | ERBB4  | ERG    | ESR1   | ETO    | ETS1   |     |
| ETV6                                                                                                      | EXOSC6 | EZH2    | FAF1   | FAM123B | FAM46C | FANCA  | FANCC    | FANCD2   | FANCE  | FANCF   | FANCG  | FANCL   | FAS     | FBXO11  | FBXO31 | FBXW7  | FGF10  | FGF14  | FGF19  |     |



Supplemental Tables for:  
Histiocytic and dendritic cell sarcomas of hematopoietic origin share targetable genomic alterations distinct from follicular dendritic cell sarcoma  
Lucas R Massoth et al.

Table S2.

---

**MGH Heme Snapshot List of Gene Targets**

The 111 gene targets covered by this test are as follows (exons):

ABL1 (4-10), ALK (22-25), ANKRD26 (1), ARID1A (1-20), ASXL1 (1-12), ATM (1-63), ATRX (8-11,17-32), BCL2 (2), BCOR (2-15), BCORL1 (1-12), BCR (1-5), BIRC3 (2-9), BRAF (3,10-15), BTK (15), CALR (1-9), CARD11 (5-9), CBL (2-5,7-9,16), CBLB (3,9-10), CBLC (9-10), CCND2 (5), CCR4 (2), CD79A (4-5), CD79B (5-6), CDKN2A (1-3), CEBPA (1), CREBBP (1-31), CSF3R (10,14-18), CUX1(1-24), CXCR4 (1-2), DCK(2-3), DDX41 (1-17), DHX15 (3), DNMT3A (1-23), DNMT3B (1-23), EP300 (1-31), ETNK1 (3), ETV6 (1-8), EZH2 (2-20), FBXW7(1-11), FLT3 (8-17,19-21), FOXO1 (1), GATA1 (2), GATA2 (2-6), GNAS (8-11), HRAS (2-4), IDH1 (3-4), IDH2 (4,6), IKZF1 (2-6, del 1-3), IKZF3 (5,8), JAK1 (14-16), JAK2 (12-16,19-25), JAK3 (3,11,13,15,18,19), KDM5A (8,11,13-14,18,21,23,25), KDM6A (1-29), KIT (1-2,5,8-15,17,18), KLF2 (1-3), KMT2A (1-36), KMT2C (14,25,27,36,38,43-44,55), KMT2D (8,11,15,31,34,39,44,53), KMT2E (14-15,21), KRAS (2-4), LUC7L2 (1-10), MAP2K1 (1-11), MEF2B (1-2), MPL (10,12), MYC (1-3), MYD88 (3-5), NF1 (1-57), NFKBIE (1), NOTCH1 (UTR,26-28,34), NOTCH2 (34), NPM1 (11), NRAS (2-5), NT5C2 (9,11,13,15,17-19), PDGFRA (12,14,15,18), PHF6 (2-10), PLCG2 (19,24), PML (1-9), PPM1D (6), PRPF40B (1-26), PTEN (1-9), PTPN11 (3-4,7-8,11-13), RAD21 (2-14), RARA (5-7,9), RB1 (1-27), RBBP6 (16,18), RHOA (2), RPS15 (4), RUNX1 (2-9), SETBP1 (4), SETD2 (1-21), SF3B1 (13-21), SH2B3 (2-8), SLC29A1 (4,13), SMC1A (1-25), SMC3 (10,13,19,23,25,28), SRC (10), SRSF2 (1-2), STAG2 (2-33), STAT3 (2-24), STAT5B (15-17), STAT6 (5,12), TET2 (3-11), TNFAIP3 (1-9), TNFRSF14 (1-6), TP53 (1-11), U2AF1 (2,6-7), U2AF2 (1-12), WT1 (1-9), XPO1 (15-16,18), ZRSR2 (1-11).

A multiplex FLT3 ITD and NPM1 exon 12 PCR assay to detect the FLT3 ITD and NPM1 insertional mutations based on size was performed with genomic DNA extracted from samples. The analytical sensitivity of detecting these mutations has been established in our laboratory at approximately 5% allele frequency or 10% mutant cells with heterozygous FLT3 ITD or NPM1 insertional mutations in a background of 90% normal cells.

---

Interpretation/reporting of variants is based on guidelines provided by the Joint Consensus Recommendation of the Association for Molecular Pathology, American Society of Clinical Oncology, and College of American Pathologists.

Supplemental Tables for:  
Histiocytic and dendritic cell sarcomas of hematopoietic origin share targetable genomic alterations distinct from follicular dendritic cell sarcoma  
Lucas R Massoth et al.

Table S3. Locations of sequenced tumor specimens

| <b>Follicular dendritic cell sarcoma (FDCS)</b>      |            |                        |                 |             |             |             |             |             |        |             |      |       |                 |         |        |            |
|------------------------------------------------------|------------|------------------------|-----------------|-------------|-------------|-------------|-------------|-------------|--------|-------------|------|-------|-----------------|---------|--------|------------|
| Sample Location                                      | Liver      | Lung                   | Retroperitoneum | Mediastinum | Lymph node  | Pelvis      | Soft tissue | Abdomen     | Neck   | Stomach     |      |       |                 |         |        |            |
| Total                                                | 11         | 7                      | 7               | 6           | 4           | 3           | 2           | 2           | 1      | 1           |      |       |                 |         |        |            |
| %                                                    | 25%        | 16%                    | 16%             | 14%         | 9%          | 7%          | 5%          | 5%          | 2%     | 2%          |      |       |                 |         |        |            |
| <b>Histiocytic sarcoma (HS)</b>                      |            |                        |                 |             |             |             |             |             |        |             |      |       |                 |         |        |            |
| Sample Location                                      | Lymph node | Central Nervous System | Bone            | Mediastinum | Neck        | Lung/Pleura | Abdomen     | Soft Tissue | Kidney | Small Bowel | Skin | Thigh | Retroperitoneum | Omentum | Tonsil | Chest wall |
| Total                                                | 12         | 5                      | 6               | 3           | 2           | 2           | 2           | 1           | 1      | 1           | 1    | 1     | 1               | 1       | 1      | 1          |
| %                                                    | 29%        | 12%                    | 15%             | 7%          | 5%          | 5%          | 5%          | 2%          | 2%     | 2%          | 2%   | 2%    | 2%              | 2%      | 2%     | 2%         |
| <b>Langerhans cell sarcoma (LCS)</b>                 |            |                        |                 |             |             |             |             |             |        |             |      |       |                 |         |        |            |
| Sample Location                                      | Skin       | Neck                   | Mediastinum     | Lung        | Small bowel | Soft tissue | Bone        |             |        |             |      |       |                 |         |        |            |
| Total                                                | 2          | 2                      | 1               | 1           | 1           | 1           | 2           |             |        |             |      |       |                 |         |        |            |
| %                                                    | 20%        | 20%                    | 10%             | 10%         | 10%         | 10%         | 20%         |             |        |             |      |       |                 |         |        |            |
| <b>Interdigitating dendritic cell sarcoma (IDCS)</b> |            |                        |                 |             |             |             |             |             |        |             |      |       |                 |         |        |            |
| Sample Location                                      | Lymph node | Spleen                 | Retroperitoneum | Lung        |             |             |             |             |        |             |      |       |                 |         |        |            |
| Total                                                | 3          | 2                      | 1               | 1           |             |             |             |             |        |             |      |       |                 |         |        |            |
| %                                                    | 43%        | 29%                    | 14%             | 14%         |             |             |             |             |        |             |      |       |                 |         |        |            |
