# Supplementary material for: Histiocytic and Dendritic Cell Sarcomas of Hematopoietic Origin Share Targetable Genomic Alterations Distinct from Follicular Dendritic Cell Sarcoma
Source: PubMed Central journal article supplement — Oncologist. 2021 May 6;26(7):e1263–72. doi: 10.1002/onco.13801 (PMC8265357; doi:10.1002/onco.13801), 2021-05-06
Supplement: ONCO-26-e1263-s003.pdf [file ONCO-26-e1263-s003.pdf]

Supplemental Figure for:  
Histiocytic and dendritic cell sarcomas of hematopoietic origin share targetable genomic alterations distinct from follicular dendritic cell sarcoma Lucas R Massoth et al.

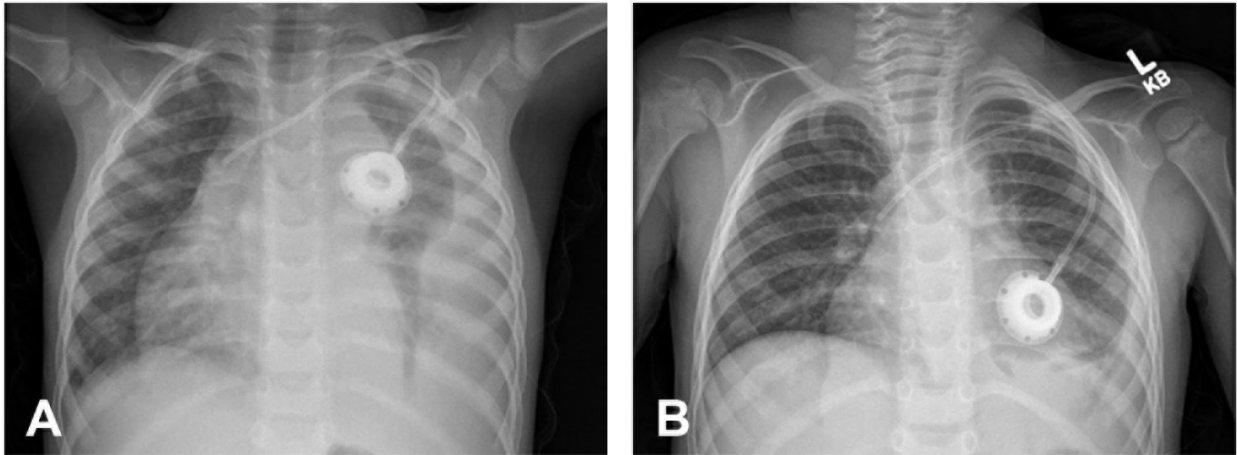

Figure S1. Illustrative patient case radiologic studies prior to and one month after temsirolimus treatment. Chest X-ray at second relapse, prior to initiation of temsirolimus, with consolidation of the left pleural cavity (A). After one month of targeted therapy, a sequential chest X-ray shows marked improvement (B).
